# Supplementary material for: Comparative Proteomic Analysis Reveals Varying Impact on Immune Responses in Phorbol 12-Myristate-13-Acetate-Mediated THP-1 Monocyte-to-Macrophage Differentiation
Source: Front Immunol. 2021 Jun 21;12:679458. doi: 10.3389/fimmu.2021.679458 (PMC8255674; doi:10.3389/fimmu.2021.679458)
Supplement: Supplementary file 9 [file Table_9.xlsx]

## Sheet: Sheet1
S9. p-values and significance levels for differential cytokine secretion after stimulation with TLR agonists (Pinto et al., 2020)
Cytokine	Condition	Sample group 1	Sample group 2	p-value	significance
IL1B	Unstimulated	Condition A	Condition B	0.411298	ns
IL1B	Unstimulated	Condition A	Condition C	0.470819	ns
IL1B	Unstimulated	Condition A	Undifferentiated	0.375016	ns
IL1B	Unstimulated	Condition B	Condition C	0.047511	*
IL1B	Unstimulated	Condition B	Undifferentiated	0.0521394	ns
IL1B	Unstimulated	Condition C	Undifferentiated	0.0255809	*
IL1B	CL075	Condition A	Condition B	0.00135538	**
IL1B	CL075	Condition A	Condition C	0.00348442	**
IL1B	CL075	Condition A	Undifferentiated	0.00319389	**
IL1B	CL075	Condition B	Condition C	0.000550841	***
IL1B	CL075	Condition B	Undifferentiated	0.00137774	**
IL1B	CL075	Condition C	Undifferentiated	0.00307498	**
IL1B	CpG2006	Condition A	Condition B	0.0568175	ns
IL1B	CpG2006	Condition A	Condition C	0.079587	ns
IL1B	CpG2006	Condition A	Undifferentiated	0.0357405	*
IL1B	CpG2006	Condition B	Condition C	0.0442587	*
IL1B	CpG2006	Condition B	Undifferentiated	0.00792938	**
IL1B	CpG2006	Condition C	Undifferentiated	0.01021	*
IL1B	FSL1	Condition A	Condition B	0.730164	ns
IL1B	FSL1	Condition A	Condition C	0.281205	ns
IL1B	FSL1	Condition A	Undifferentiated	0.00661075	**
IL1B	FSL1	Condition B	Condition C	0.125818	ns
IL1B	FSL1	Condition B	Undifferentiated	4.36094e-06	****
IL1B	FSL1	Condition C	Undifferentiated	0.000184037	***
IL1B	LPS 0111:B4	Condition A	Condition B	0.00261398	**
IL1B	LPS 0111:B4	Condition A	Condition C	0.000765974	***
IL1B	LPS 0111:B4	Condition A	Undifferentiated	0.0195026	*
IL1B	LPS 0111:B4	Condition B	Condition C	0.0236598	*
IL1B	LPS 0111:B4	Condition B	Undifferentiated	0.0044409	**
IL1B	LPS 0111:B4	Condition C	Undifferentiated	0.00308008	**
IL1B	LPS K12	Condition A	Condition B	0.000780951	***
IL1B	LPS K12	Condition A	Condition C	0.00131875	**
IL1B	LPS K12	Condition A	Undifferentiated	0.00843054	**
IL1B	LPS K12	Condition B	Condition C	0.0164946	*
IL1B	LPS K12	Condition B	Undifferentiated	0.00141009	**
IL1B	LPS K12	Condition C	Undifferentiated	0.00287246	**
IL1B	Pam3CSK4	Condition A	Condition B	0.0141743	*
IL1B	Pam3CSK4	Condition A	Condition C	0.00432294	**
IL1B	Pam3CSK4	Condition A	Undifferentiated	0.0111108	*
IL1B	Pam3CSK4	Condition B	Condition C	0.13488	ns
IL1B	Pam3CSK4	Condition B	Undifferentiated	0.000618999	***
IL1B	Pam3CSK4	Condition C	Undifferentiated	0.000445511	***
IL1B	Poly (I:C)	Condition A	Condition B	0.953013	ns
IL1B	Poly (I:C)	Condition A	Condition C	0.0766136	ns
IL1B	Poly (I:C)	Condition A	Undifferentiated	0.0094943	**
IL1B	Poly (I:C)	Condition B	Condition C	0.0830057	ns
IL1B	Poly (I:C)	Condition B	Undifferentiated	0.00973822	**
IL1B	Poly (I:C)	Condition C	Undifferentiated	0.011158	*
IL1B	R837	Condition A	Condition B	0.0332685	*
IL1B	R837	Condition A	Condition C	0.834852	ns
IL1B	R837	Condition A	Undifferentiated	0.00322882	**
IL1B	R837	Condition B	Condition C	0.0311323	*
IL1B	R837	Condition B	Undifferentiated	0.0106902	*
IL1B	R837	Condition C	Undifferentiated	0.00518768	**
IL1B	R848	Condition A	Condition B	0.76943	ns
IL1B	R848	Condition A	Condition C	0.757128	ns
IL1B	R848	Condition A	Undifferentiated	0.00103317	**
IL1B	R848	Condition B	Condition C	0.675485	ns
IL1B	R848	Condition B	Undifferentiated	0.0160513	*
IL1B	R848	Condition C	Undifferentiated	0.0583519	ns
IL6	Unstimulated	Condition A	Condition B	0.430258	ns
IL6	Unstimulated	Condition A	Condition C	0.423592	ns
IL6	Unstimulated	Condition A	Undifferentiated	0.424537	ns
IL6	Unstimulated	Condition B	Condition C	0.474396	ns
IL6	Unstimulated	Condition B	Undifferentiated	0.532261	ns
IL6	Unstimulated	Condition C	Undifferentiated	0.518519	ns
IL6	CL075	Condition A	Condition B	0.000386743	***
IL6	CL075	Condition A	Condition C	9.01806e-05	****
IL6	CL075	Condition A	Undifferentiated	0.0641678	ns
IL6	CL075	Condition B	Condition C	0.0183401	*
IL6	CL075	Condition B	Undifferentiated	0.00226193	**
IL6	CL075	Condition C	Undifferentiated	4.88817e-05	****
IL6	CpG2006	Condition A	Condition B	0.0782251	ns
IL6	CpG2006	Condition A	Condition C	0.161985	ns
IL6	CpG2006	Condition A	Undifferentiated	0.0737667	ns
IL6	CpG2006	Condition B	Condition C	0.598009	ns
IL6	CpG2006	Condition B	Undifferentiated	0.442433	ns
IL6	CpG2006	Condition C	Undifferentiated	0.342119	ns
IL6	FSL1	Condition A	Condition B	0.00216632	**
IL6	FSL1	Condition A	Condition C	0.00489802	**
IL6	FSL1	Condition A	Undifferentiated	0.00290925	**
IL6	FSL1	Condition B	Condition C	0.000956989	***
IL6	FSL1	Condition B	Undifferentiated	0.00145721	**
IL6	FSL1	Condition C	Undifferentiated	0.00228049	**
IL6	LPS 0111:B4	Condition A	Condition B	0.0545664	ns
IL6	LPS 0111:B4	Condition A	Condition C	0.00478818	**
IL6	LPS 0111:B4	Condition A	Undifferentiated	0.0281826	*
IL6	LPS 0111:B4	Condition B	Condition C	0.166743	ns
IL6	LPS 0111:B4	Condition B	Undifferentiated	0.0403274	*
IL6	LPS 0111:B4	Condition C	Undifferentiated	0.00574162	**
IL6	LPS K12	Condition A	Condition B	0.55445	ns
IL6	LPS K12	Condition A	Condition C	0.0118452	*
IL6	LPS K12	Condition A	Undifferentiated	0.00399338	**
IL6	LPS K12	Condition B	Condition C	0.0125814	*
IL6	LPS K12	Condition B	Undifferentiated	0.00271024	**
IL6	LPS K12	Condition C	Undifferentiated	0.00815764	**
IL6	Pam3CSK4	Condition A	Condition B	0.114591	ns
IL6	Pam3CSK4	Condition A	Condition C	0.00201115	**
IL6	Pam3CSK4	Condition A	Undifferentiated	0.00152855	**
IL6	Pam3CSK4	Condition B	Condition C	0.000376242	***
IL6	Pam3CSK4	Condition B	Undifferentiated	0.000548895	***
IL6	Pam3CSK4	Condition C	Undifferentiated	0.000309394	***
IL6	Poly (I:C)	Condition A	Condition B	0.000149066	***
IL6	Poly (I:C)	Condition A	Condition C	0.00184513	**
IL6	Poly (I:C)	Condition A	Undifferentiated	0.00120114	**
IL6	Poly (I:C)	Condition B	Condition C	0.881367	ns
IL6	Poly (I:C)	Condition B	Undifferentiated	0.0153668	*
IL6	Poly (I:C)	Condition C	Undifferentiated	0.0483976	*
IL6	R837	Condition A	Condition B	0.0346651	*
IL6	R837	Condition A	Condition C	0.00759685	**
IL6	R837	Condition A	Undifferentiated	0.00949906	**
IL6	R837	Condition B	Condition C	0.0112418	*
IL6	R837	Condition B	Undifferentiated	0.0112785	*
IL6	R837	Condition C	Undifferentiated	0.0311879	*
IL6	R848	Condition A	Condition B	0.518519	ns
IL6	R848	Condition A	Condition C	0.473848	ns
IL6	R848	Condition A	Undifferentiated	0.474396	ns
IL6	R848	Condition B	Condition C	0.911955	ns
IL6	R848	Condition B	Undifferentiated	0.20003	ns
IL6	R848	Condition C	Undifferentiated	0.00506332	**
TNFa	Unstimulated	Condition A	Condition B	0.405469	ns
TNFa	Unstimulated	Condition A	Condition C	0.397328	ns
TNFa	Unstimulated	Condition A	Undifferentiated	0.396287	ns
TNFa	Unstimulated	Condition B	Condition C	5.30773e-05	****
TNFa	Unstimulated	Condition B	Undifferentiated	0.00764544	**
TNFa	Unstimulated	Condition C	Undifferentiated	0.412527	ns
TNFa	CL075	Condition A	Condition B	0.000342091	***
TNFa	CL075	Condition A	Condition C	0.000735117	***
TNFa	CL075	Condition A	Undifferentiated	0.039267	*
TNFa	CL075	Condition B	Condition C	0.000917131	***
TNFa	CL075	Condition B	Undifferentiated	6.60475e-05	****
TNFa	CL075	Condition C	Undifferentiated	0.000779353	***
TNFa	CpG2006	Condition A	Condition B	0.069061	ns
TNFa	CpG2006	Condition A	Condition C	0.0500319	ns
TNFa	CpG2006	Condition A	Undifferentiated	0.0491113	*
TNFa	CpG2006	Condition B	Condition C	0.008728	**
TNFa	CpG2006	Condition B	Undifferentiated	0.0115648	*
TNFa	CpG2006	Condition C	Undifferentiated	0.440965	ns
TNFa	FSL1	Condition A	Condition B	0.0445433	*
TNFa	FSL1	Condition A	Condition C	0.041509	*
TNFa	FSL1	Condition A	Undifferentiated	0.0300845	*
TNFa	FSL1	Condition B	Condition C	0.00186408	**
TNFa	FSL1	Condition B	Undifferentiated	0.00282851	**
TNFa	FSL1	Condition C	Undifferentiated	0.0209324	*
TNFa	LPS 0111:B4	Condition A	Condition B	0.0867046	ns
TNFa	LPS 0111:B4	Condition A	Condition C	0.125746	ns
TNFa	LPS 0111:B4	Condition A	Undifferentiated	0.0226459	*
TNFa	LPS 0111:B4	Condition B	Condition C	0.888263	ns
TNFa	LPS 0111:B4	Condition B	Undifferentiated	0.0586538	ns
TNFa	LPS 0111:B4	Condition C	Undifferentiated	0.0878926	ns
TNFa	LPS K12	Condition A	Condition B	0.0174489	*
TNFa	LPS K12	Condition A	Condition C	0.330474	ns
TNFa	LPS K12	Condition A	Undifferentiated	0.00602	**
TNFa	LPS K12	Condition B	Condition C	0.217988	ns
TNFa	LPS K12	Condition B	Undifferentiated	0.000655809	***
TNFa	LPS K12	Condition C	Undifferentiated	0.155537	ns
TNFa	Pam3CSK4	Condition A	Condition B	0.948673	ns
TNFa	Pam3CSK4	Condition A	Condition C	0.058253	ns
TNFa	Pam3CSK4	Condition A	Undifferentiated	0.0496955	*
TNFa	Pam3CSK4	Condition B	Condition C	0.0137783	*
TNFa	Pam3CSK4	Condition B	Undifferentiated	0.00827152	**
TNFa	Pam3CSK4	Condition C	Undifferentiated	0.181931	ns
TNFa	Poly (I:C)	Condition A	Condition B	0.425868	ns
TNFa	Poly (I:C)	Condition A	Condition C	0.0293632	*
TNFa	Poly (I:C)	Condition A	Undifferentiated	0.0207004	*
TNFa	Poly (I:C)	Condition B	Condition C	0.0134612	*
TNFa	Poly (I:C)	Condition B	Undifferentiated	0.0096152	**
TNFa	Poly (I:C)	Condition C	Undifferentiated	0.00318654	**
TNFa	R837	Condition A	Condition B	0.0155429	*
TNFa	R837	Condition A	Condition C	0.19085	ns
TNFa	R837	Condition A	Undifferentiated	0.0615159	ns
TNFa	R837	Condition B	Condition C	0.0153205	*
TNFa	R837	Condition B	Undifferentiated	0.00712084	**
TNFa	R837	Condition C	Undifferentiated	0.021921	*
TNFa	R848	Condition A	Condition B	0.0310012	*
TNFa	R848	Condition A	Condition C	6.88425e-05	****
TNFa	R848	Condition A	Undifferentiated	0.000398893	***
TNFa	R848	Condition B	Condition C	8.58552e-05	****
TNFa	R848	Condition B	Undifferentiated	3.7908e-06	****
TNFa	R848	Condition C	Undifferentiated	0.0422788	*
IL8	Unstimulated	Condition A	Condition B	0.400274	ns
IL8	Unstimulated	Condition A	Condition C	0.391672	ns
IL8	Unstimulated	Condition A	Undifferentiated	0.377435	ns
IL8	Unstimulated	Condition B	Condition C	0.00856534	**
IL8	Unstimulated	Condition B	Undifferentiated	0.00238189	**
IL8	Unstimulated	Condition C	Undifferentiated	0.00810513	**
IL8	CL075	Condition A	Condition B	0.0129378	*
IL8	CL075	Condition A	Condition C	0.000873835	***
IL8	CL075	Condition A	Undifferentiated	0.0324076	*
IL8	CL075	Condition B	Condition C	0.00748463	**
IL8	CL075	Condition B	Undifferentiated	0.0126486	*
IL8	CL075	Condition C	Undifferentiated	0.00242358	**
IL8	CpG2006	Condition A	Condition B	0.112198	ns
IL8	CpG2006	Condition A	Condition C	0.0803505	ns
IL8	CpG2006	Condition A	Undifferentiated	0.0664019	ns
IL8	CpG2006	Condition B	Condition C	0.00295578	**
IL8	CpG2006	Condition B	Undifferentiated	0.00390229	**
IL8	CpG2006	Condition C	Undifferentiated	0.0077126	**
IL8	FSL1	Condition A	Condition B	0.461809	ns
IL8	FSL1	Condition A	Condition C	0.000755822	***
IL8	FSL1	Condition A	Undifferentiated	0.01951	*
IL8	FSL1	Condition B	Condition C	0.00103811	**
IL8	FSL1	Condition B	Undifferentiated	0.0114524	*
IL8	FSL1	Condition C	Undifferentiated	0.00262352	**
IL8	LPS 0111:B4	Condition A	Condition B	0.0535728	ns
IL8	LPS 0111:B4	Condition A	Condition C	0.00556239	**
IL8	LPS 0111:B4	Condition A	Undifferentiated	0.0242818	*
IL8	LPS 0111:B4	Condition B	Condition C	0.10571	ns
IL8	LPS 0111:B4	Condition B	Undifferentiated	0.0326409	*
IL8	LPS 0111:B4	Condition C	Undifferentiated	0.006974	**
IL8	LPS K12	Condition A	Condition B	0.175098	ns
IL8	LPS K12	Condition A	Condition C	0.00991197	**
IL8	LPS K12	Condition A	Undifferentiated	0.0401775	*
IL8	LPS K12	Condition B	Condition C	0.0075332	**
IL8	LPS K12	Condition B	Undifferentiated	0.0439722	*
IL8	LPS K12	Condition C	Undifferentiated	0.0103397	*
IL8	Pam3CSK4	Condition A	Condition B	0.129548	ns
IL8	Pam3CSK4	Condition A	Condition C	0.0744669	ns
IL8	Pam3CSK4	Condition A	Undifferentiated	0.012989	*
IL8	Pam3CSK4	Condition B	Condition C	0.126599	ns
IL8	Pam3CSK4	Condition B	Undifferentiated	0.0465698	*
IL8	Pam3CSK4	Condition C	Undifferentiated	0.052222	ns
IL8	Poly (I:C)	Condition A	Condition B	0.41309	ns
IL8	Poly (I:C)	Condition A	Condition C	0.040116	*
IL8	Poly (I:C)	Condition A	Undifferentiated	0.010342	*
IL8	Poly (I:C)	Condition B	Condition C	0.000123891	***
IL8	Poly (I:C)	Condition B	Undifferentiated	0.0002688	***
IL8	Poly (I:C)	Condition C	Undifferentiated	0.00118467	**
IL8	R837	Condition A	Condition B	0.0518326	ns
IL8	R837	Condition A	Condition C	0.0338954	*
IL8	R837	Condition A	Undifferentiated	0.00666261	**
IL8	R837	Condition B	Condition C	0.171814	ns
IL8	R837	Condition B	Undifferentiated	0.021909	*
IL8	R837	Condition C	Undifferentiated	0.00986024	**
IL8	R848	Condition A	Condition B	0.136657	ns
IL8	R848	Condition A	Condition C	0.00370846	**
IL8	R848	Condition A	Undifferentiated	0.00369146	**
IL8	R848	Condition B	Condition C	0.0124155	*
IL8	R848	Condition B	Undifferentiated	0.00152218	**
IL8	R848	Condition C	Undifferentiated	0.0243408	*
